# Supplementary material for: A Cu/β-cyclodextrin/reduced graphene oxide nanocomposite for efficient and multi-aflatoxin detection in rice, ginger and bean samples
Source: Royal Society of Chemistry journal article supplement (doi:10.1039/d4ay01846j), 2024-12-04
Supplement: d4ay01846j1.pdf [file d4ay01846j1.pdf]

## Supporting Information

### Cu/ $\beta$ -cyclodextrin/reduced graphene oxide nanocomposite for efficient and multi-aflatoxin detection in rice, ginger and bean samples

Behnaz Shahryari<sup>a</sup>, Rouhollah Khani<sup>a\*</sup>, Javad Feizy<sup>b</sup>

<sup>a</sup>Department of Chemistry, Faculty of Science, University of Birjand, Birjand 97179-414, Iran.

<sup>b</sup>Department of Food Safety and Quality Control, Research Institute of Food Science and Technology (RIFST), Mashhad, Iran.

\*Corresponding author:

E-mail address: Rouhollah.khani@birjand.ac.ir

Tel: +98 56 32202065

fax: +98 56 32202065

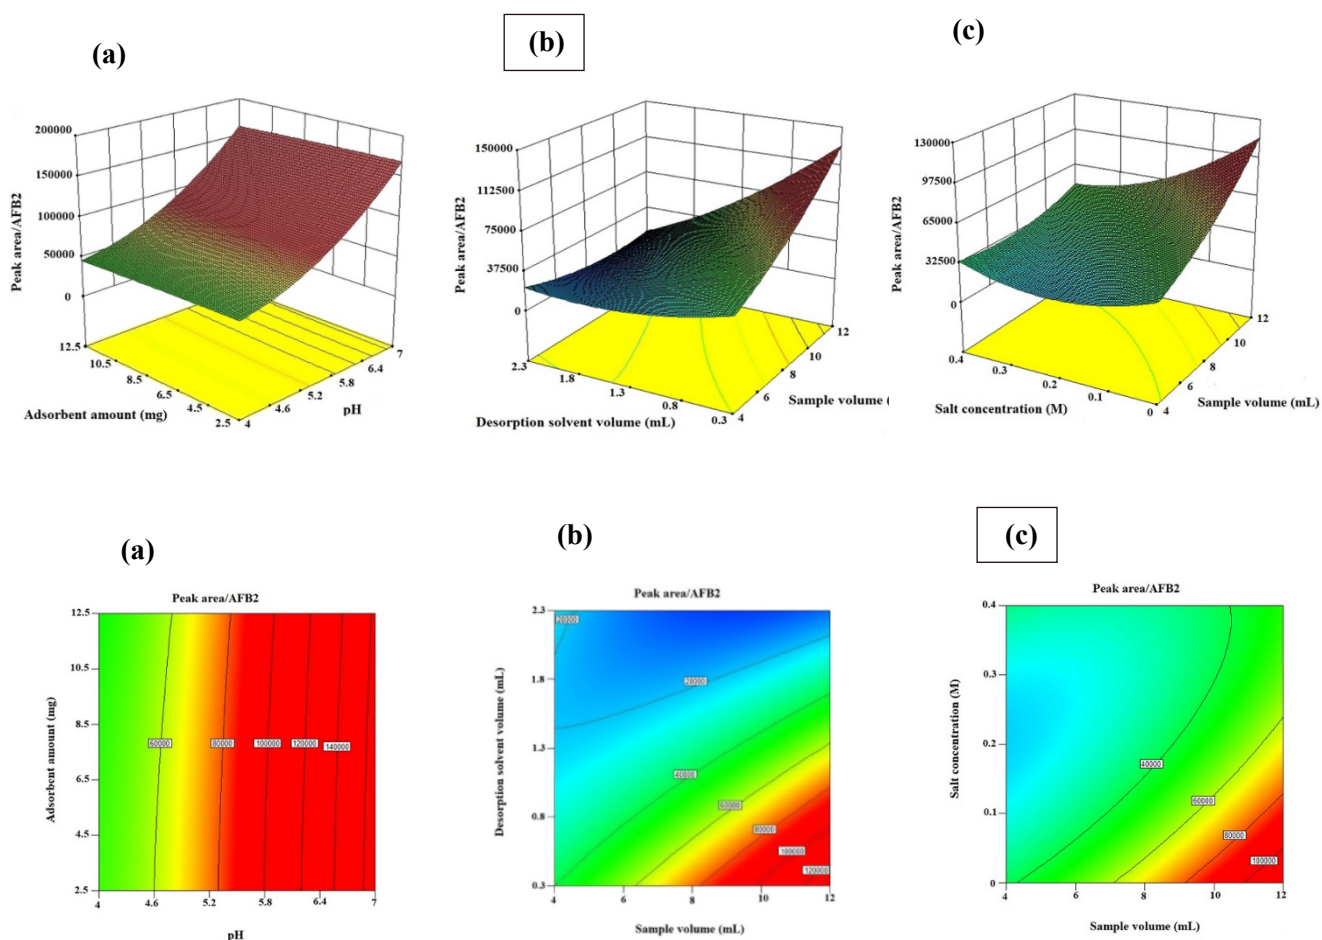

**Fig. S1** 3-D and contour plots for extraction of AFB<sub>2</sub>. (a) Sorbent and pH (b) Desorption solvent volume and sample volume (c) Salt Concentration and sample volume .

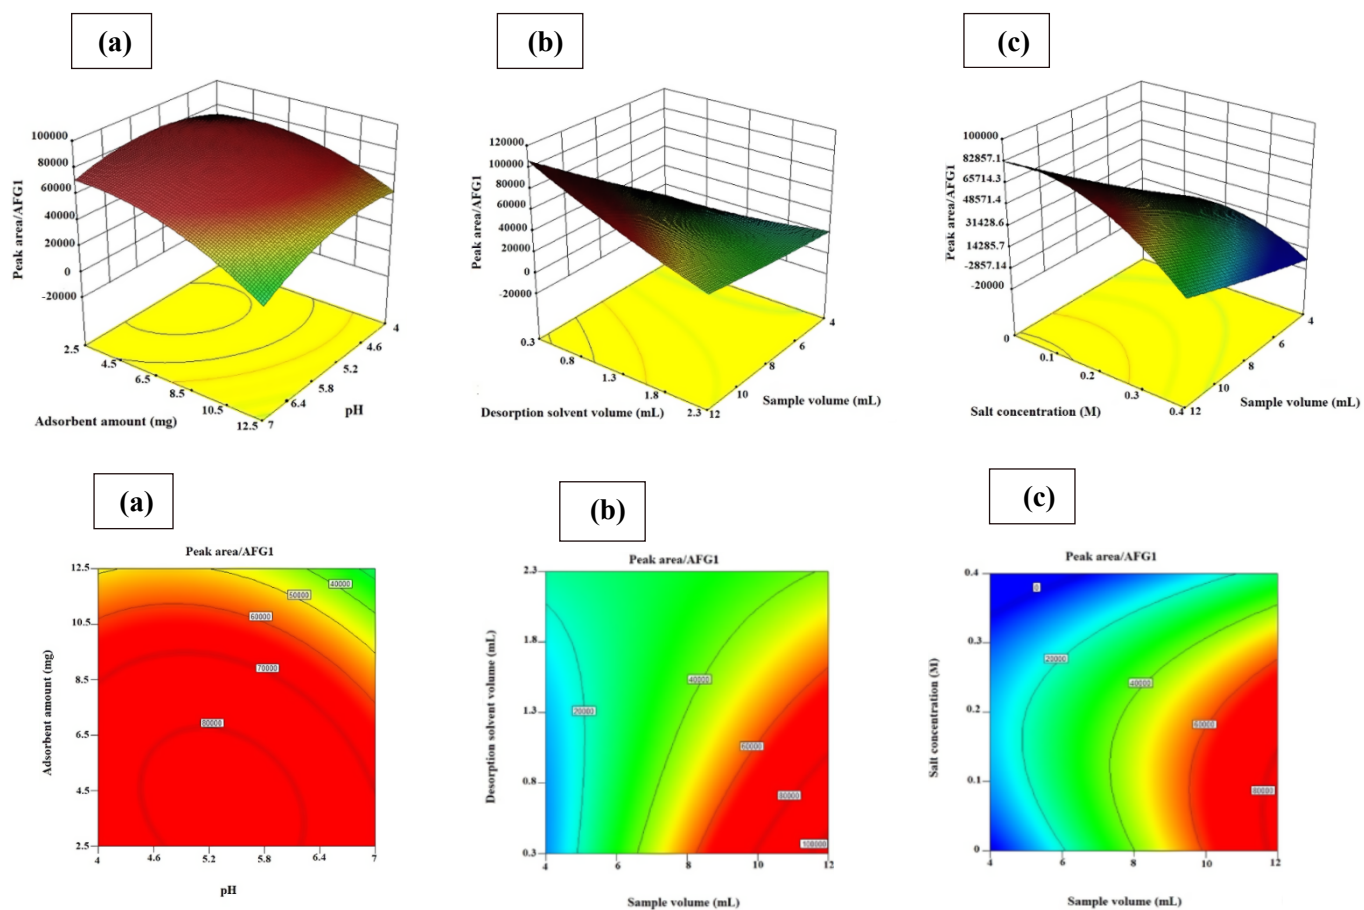

**Fig. S2** 3-D and contour plots for extraction of AFG<sub>1</sub>. (a) Sorbent and pH (b) Desorption solvent volume and sample volume (c) Salt Concentration and sample volume .

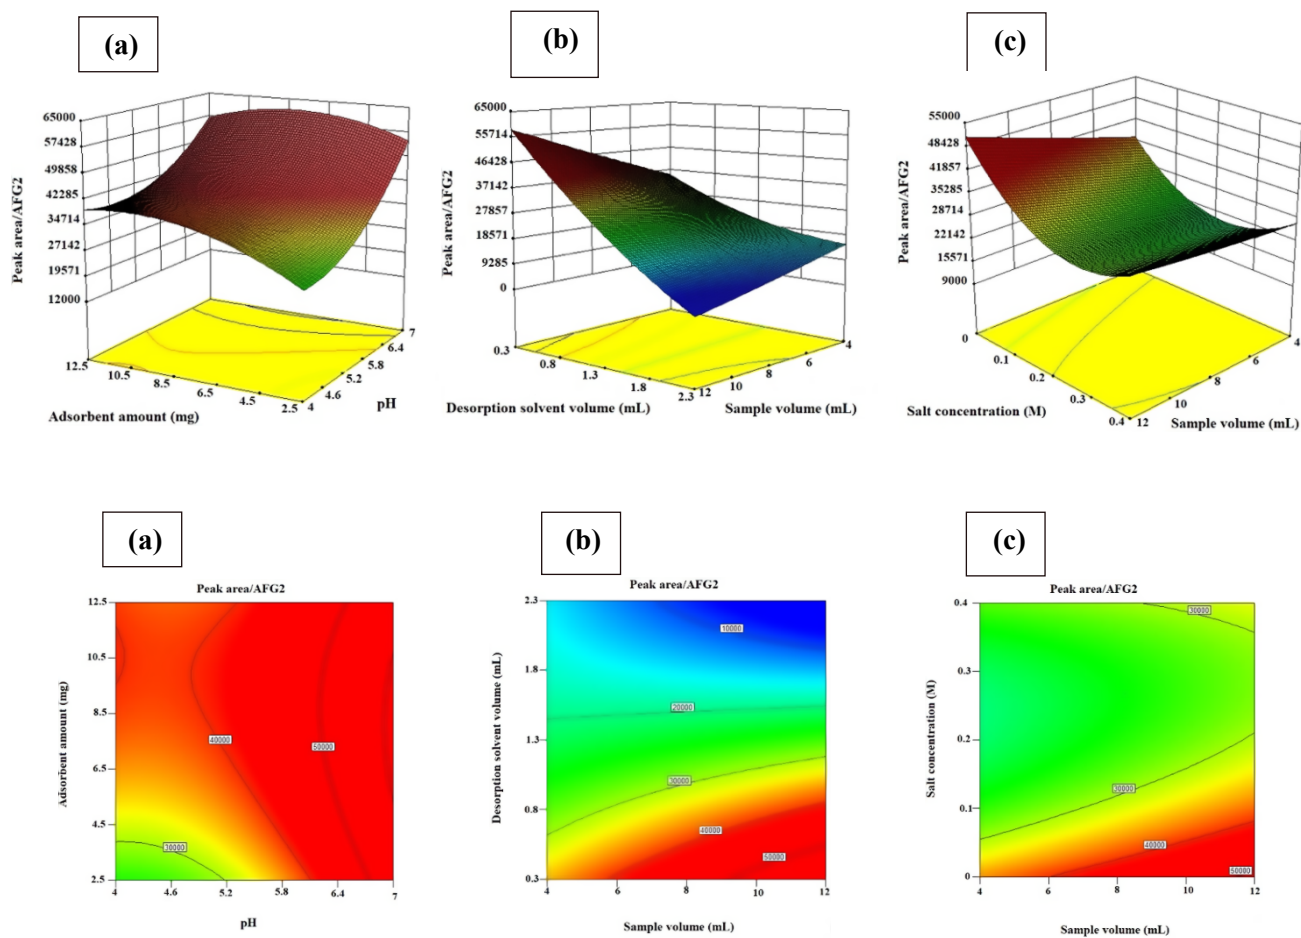

**Fig. S3** 3-D and contour plots for extraction of AFG<sub>2</sub>. (a) Sorbent and pH (b) Desorption solvent volume and sample volume (c) Salt Concentration and sample volume .
